# Supplementary material for: Is monitoring of plasma 5-fluorouracil levels in metastatic / advanced colorectal cancer clinically effective? A systematic review
Source: PubMed Central journal article supplement (PMC4960837; doi:10.1186/s12885-016-2581-x), 2016-07-25
Supplement: 12885_2016_2581_MOESM1_ESM.pdf [file 12885_2016_2581_MOESM1_ESM.pdf]

## Additional file 1 Search strategy

Embase Classic+Embase 1947 to 2014 Week 01 (Ovid), searched on 07/01/2014

|    |                                                                                                                                     |        |
|----|-------------------------------------------------------------------------------------------------------------------------------------|--------|
| 1  | (my5-fu* or My5-FU* or "my5 fu*" or "my 5fu*" or "my 5 fu*").mp.                                                                    | 6      |
| 2  | ondose.mp.                                                                                                                          | 6      |
| 3  | saladax.mp.                                                                                                                         | 10     |
| 4  | 1 or 2 or 3                                                                                                                         | 18     |
| 5  | "myriad genetic*".mp.                                                                                                               | 125    |
| 6  | exp immunoassay/                                                                                                                    | 389934 |
| 7  | (immunoassay* or (immun* adj2 assay*)).mp.                                                                                          | 379025 |
| 8  | 6 or 7                                                                                                                              | 474599 |
| 9  | high performance liquid chromatography/                                                                                             | 197019 |
| 10 | "high performance liquid chromatography".tw.                                                                                        | 80851  |
| 11 | HPLC.tw.                                                                                                                            | 130008 |
| 12 | "high pressure liquid chromatography".tw.                                                                                           | 11005  |
| 13 | high speed liquid chromatography.tw.                                                                                                | 264    |
| 14 | 9 or 10 or 11 or 12 or 13                                                                                                           | 256728 |
| 15 | liquid chromatography/ and mass spectrometry/                                                                                       | 22033  |
| 16 | Liquid chromatography-mass spectrometry.tw.                                                                                         | 9168   |
| 17 | LC?MS*.tw.                                                                                                                          | 866    |
| 18 | HPLC?MS.tw.                                                                                                                         | 42     |
| 19 | 15 or 16 or 17 or 18                                                                                                                | 27415  |
| 20 | ((pharmacokinetic* or PK) adj2 (dosage* or dose* or dosing or adjust* or adapt* or monitor* or select* or calculat* or guided)).mp. | 29883  |

|    |                                                                                                                                                                                                                                                                               |        |
|----|-------------------------------------------------------------------------------------------------------------------------------------------------------------------------------------------------------------------------------------------------------------------------------|--------|
| 21 | fluorouracil/pk                                                                                                                                                                                                                                                               | 2869   |
| 22 | fluorouracil/                                                                                                                                                                                                                                                                 | 105631 |
| 23 | (fluorouracil* or 5-fluorouracil* or 5fluorouracil*).tw.                                                                                                                                                                                                                      | 37057  |
| 24 | (5-fu* or 5fu* or fu).tw.                                                                                                                                                                                                                                                     | 31818  |
| 25 | 22 or 23 or 24                                                                                                                                                                                                                                                                | 118732 |
| 26 | exp drug dose/                                                                                                                                                                                                                                                                | 417095 |
| 27 | drug monitoring/ or drug clearance/                                                                                                                                                                                                                                           | 79769  |
| 28 | ((dose* or dosing or dosage* or fluorouracil* or 5-fluorouracil* or 5fluorouracil* or 5-fu* or 5fu*) adj2 (adjust* or adapt* or monitor* or select* or calculat* or intensi* or escalat* or modif* or reduc* or concentration* or level* or limit* or detect* or measur*).tw. | 160112 |
| 29 | ((drug* or blood or plasma) adj5 (monitor* or concentration* or level*) adj5 (fluorouracil* or 5-fluorouracil* or 5fluorouracil* or 5-fu* or 5fu* or fu)).tw.                                                                                                                 | 652    |
| 30 | ("optimal drug therapy" or ("optimal drug" adj (dosage* or dose* or dosing))).tw.                                                                                                                                                                                             | 338    |
| 31 | 26 or 27 or 28 or 29 or 30                                                                                                                                                                                                                                                    | 604858 |
| 32 | personalized medicine/ and exp chemotherapy/                                                                                                                                                                                                                                  | 865    |
| 33 | ((personal* or individual*) adj2 (chemotherap* or dosage* or dose* or dosing)).mp.                                                                                                                                                                                            | 10000  |
| 34 | 32 or 33                                                                                                                                                                                                                                                                      | 10652  |
| 35 | 31 or 34                                                                                                                                                                                                                                                                      | 611253 |
| 36 | 5 and 25                                                                                                                                                                                                                                                                      | 5      |
| 37 | 5 and 35                                                                                                                                                                                                                                                                      | 5      |
| 38 | 36 or 37                                                                                                                                                                                                                                                                      | 8      |
| 39 | 8 and 25 and 35                                                                                                                                                                                                                                                               | 251    |
| 40 | ((5-fu* or 5fu* or fu) adj "plasma assay").mp.                                                                                                                                                                                                                                | 2      |

|    |                           |      |
|----|---------------------------|------|
| 41 | 21 and 35                 | 1315 |
| 42 | 4 or 38 or 39 or 40 or 41 | 1565 |
| 43 | 14 and 25                 | 1263 |
| 44 | 19 and 25                 | 95   |
| 45 | 43 or 44                  | 1331 |
| 46 | 35 and 45                 | 496  |
| 47 | 20 and 25                 | 319  |
| 48 | 42 or 46 or 47            | 2102 |

**MEDLINE(R) 1946 to November Week 3 2013 (Ovid), searched on 07/01/2014**

|    |                                                                                                                                     |        |
|----|-------------------------------------------------------------------------------------------------------------------------------------|--------|
| 1  | (my5-fu* or My5-FU* or "my5 fu*" or "my 5fu*" or "my 5 fu*").mp.                                                                    | 0      |
| 2  | ondose.mp.                                                                                                                          | 2      |
| 3  | saladax.mp.                                                                                                                         | 1      |
| 4  | 1 or 2 or 3                                                                                                                         | 3      |
| 5  | "myriad genetic*".mp.                                                                                                               | 92     |
| 6  | exp Immunoassay/                                                                                                                    | 453924 |
| 7  | (immunoassay* or (immun* adj2 assay*)).mp.                                                                                          | 248384 |
| 8  | 6 or 7                                                                                                                              | 527480 |
| 9  | Chromatography, High Pressure Liquid/                                                                                               | 155449 |
| 10 | "high performance liquid chromatography".tw.                                                                                        | 65042  |
| 11 | HPLC.tw.                                                                                                                            | 91531  |
| 12 | "high pressure liquid chromatography".tw.                                                                                           | 9702   |
| 13 | high speed liquid chromatography.tw.                                                                                                | 156    |
| 14 | 9 or 10 or 11 or 12 or 13                                                                                                           | 209442 |
| 15 | exp Chromatography, Liquid/ and exp Mass Spectrometry/                                                                              | 65715  |
| 16 | Liquid chromatography-mass spectrometry.tw.                                                                                         | 7763   |
| 17 | LC?MS*.tw.                                                                                                                          | 365    |
| 18 | HPLC?MS.tw.                                                                                                                         | 5      |
| 19 | 15 or 16 or 17 or 18                                                                                                                | 68737  |
| 20 | ((pharmacokinetic* or PK) adj2 (dosage* or dose* or dosing or adjust* or adapt* or monitor* or select* or calculat* or guided)).mp. | 6441   |
| 21 | exp Fluorouracil/pk                                                                                                                 | 1533   |
| 22 | exp Fluorouracil/                                                                                                                   | 42066  |

|    |                                                                                                                                                                                                                                                                                |        |
|----|--------------------------------------------------------------------------------------------------------------------------------------------------------------------------------------------------------------------------------------------------------------------------------|--------|
| 23 | (fluorouracil* or 5-fluorouracil* or 5fluorouracil*).tw.                                                                                                                                                                                                                       | 29605  |
| 24 | (5-fu* or 5fu* or fu).tw.                                                                                                                                                                                                                                                      | 21573  |
| 25 | 22 or 23 or 24                                                                                                                                                                                                                                                                 | 55027  |
| 26 | Dose-response Relationship, Drug/ or Drug Dosage Calculations/                                                                                                                                                                                                                 | 356879 |
| 27 | Drug Monitoring/ or Metabolic Clearance Rate/                                                                                                                                                                                                                                  | 36771  |
| 28 | ((dose* or dosing or dosage* or fluorouracil* or 5-fluorouracil* or 5fluorouracil* or 5-fu* or 5fu*) adj2 (adjust* or adapt* or monitor* or select* or calculat* or intensi* or escalat* or modif* or reduc* or concentration* or level* or limit* or detect* or measur*)).tw. | 111057 |
| 29 | ((drug* or blood or plasma) adj5 (monitor* or concentration* or level*) adj5 (fluorouracil* or 5-fluorouracil* or 5fluorouracil* or 5-fu* or 5fu* or fu)).tw.                                                                                                                  | 549    |
| 30 | ("optimal drug therapy" or ("optimal drug" adj (dosage* or dose* or dosing))).tw.                                                                                                                                                                                              | 231    |
| 31 | 26 or 27 or 28 or 29 or 30                                                                                                                                                                                                                                                     | 476498 |
| 32 | Individualized Medicine/                                                                                                                                                                                                                                                       | 4498   |
| 33 | ((personal* or individual*) adj2 (chemotherap* or dosage* or dose* or dosing)).mp.                                                                                                                                                                                             | 5704   |
| 34 | 32 or 33                                                                                                                                                                                                                                                                       | 10111  |
| 35 | 31 or 34                                                                                                                                                                                                                                                                       | 484057 |
| 36 | 5 and 25                                                                                                                                                                                                                                                                       | 3      |
| 37 | 5 and 35                                                                                                                                                                                                                                                                       | 4      |
| 38 | 36 or 37                                                                                                                                                                                                                                                                       | 5      |
| 39 | 8 and 25 and 35                                                                                                                                                                                                                                                                | 172    |
| 40 | ((5-fu* or 5fu* or fu) adj "plasma assay*").mp.                                                                                                                                                                                                                                | 1      |
| 41 | 21 and 35                                                                                                                                                                                                                                                                      | 773    |

|    |                           |      |
|----|---------------------------|------|
| 42 | 4 or 38 or 39 or 40 or 41 | 942  |
| 43 | 14 and 25                 | 857  |
| 44 | 19 and 25                 | 138  |
| 45 | 43 or 44                  | 904  |
| 46 | 35 and 45                 | 319  |
| 47 | 20 and 25                 | 92   |
| 48 | 42 or 46 or 47            | 1171 |

**Medline In-Process & Other Non-Indexed Citations January 07, 2014 to November Week 3 2013  
(Ovid), searched on 07/01/2014**

|    |                                                                                                                                                     |       |
|----|-----------------------------------------------------------------------------------------------------------------------------------------------------|-------|
| 1  | (my5-fu* or My5-FU* or "my5 fu*" or "my 5fu*" or "my 5 fu*").mp.                                                                                    | 1     |
| 2  | ondose.mp.                                                                                                                                          | 0     |
| 3  | saladax.mp.                                                                                                                                         | 1     |
| 4  | 1 or 2 or 3                                                                                                                                         | 1     |
| 5  | "myriad genetic*".mp.                                                                                                                               | 11    |
| 6  | (immunoassay* or (immun* adj2 assay*)).mp.                                                                                                          | 9114  |
| 7  | "high performance liquid chromatography".tw.                                                                                                        | 9130  |
| 8  | HPLC.tw.                                                                                                                                            | 7931  |
| 9  | "high pressure liquid chromatography".tw.                                                                                                           | 470   |
| 10 | high speed liquid chromatography.tw.                                                                                                                | 25    |
| 11 | 7 or 8 or 9 or 10                                                                                                                                   | 14539 |
| 12 | Liquid chromatography-mass spectrometry.tw.                                                                                                         | 872   |
| 13 | LC?MS*.tw.                                                                                                                                          | 61    |
| 14 | HPLC?MS.tw.                                                                                                                                         | 0     |
| 15 | 12 or 13 or 14                                                                                                                                      | 924   |
| 16 | ((pharmacokinetic* or PK) adj2 (dosage* or dose* or dosing or adjust* or adapt* or monitor* or select* or calculat* or guided)).mp.                 | 365   |
| 17 | (fluorouracil* or 5-fluorouracil* or 5fluorouracil*).tw.                                                                                            | 1413  |
| 18 | (5-fu* or 5fu* or fu).tw.                                                                                                                           | 1243  |
| 19 | 17 or 18                                                                                                                                            | 2089  |
| 20 | ((dose* or dosing or dosage* or fluorouracil* or 5-fluorouracil* or 5fluorouracil* or 5-fu* or 5fu*) adj2 (adjust* or adapt* or monitor* or select* | 6026  |

|    |                                                                                                                                                               |      |
|----|---------------------------------------------------------------------------------------------------------------------------------------------------------------|------|
|    | or calculat* or intensi* or escalat* or modif* or reduc* or concentration* or level* or limit* or detect* or measur*).tw.                                     |      |
| 21 | ((drug* or blood or plasma) adj5 (monitor* or concentration* or level*) adj5 (fluorouracil* or 5-fluorouracil* or 5fluorouracil* or 5-fu* or 5fu* or fu)).tw. | 19   |
| 22 | ("optimal drug therapy" or ("optimal drug" adj (dosage* or dose* or dosing))).tw.                                                                             | 19   |
| 23 | 20 or 21 or 22                                                                                                                                                | 6051 |
| 24 | ((personal* or individual*) adj2 (chemotherap* or dosage* or dose* or dosing)).mp.                                                                            | 306  |
| 25 | 23 or 24                                                                                                                                                      | 6275 |
| 26 | 5 and 19                                                                                                                                                      | 1    |
| 27 | 5 and 25                                                                                                                                                      | 0    |
| 28 | 26 or 27                                                                                                                                                      | 1    |
| 29 | 6 and 19 and 25                                                                                                                                               | 2    |
| 30 | ((5-fu* or 5fu* or fu) adj "plasma assay*").mp.                                                                                                               | 0    |
| 31 | 4 or 28 or 29 or 30                                                                                                                                           | 3    |
| 32 | 11 and 19                                                                                                                                                     | 47   |
| 33 | 15 and 19                                                                                                                                                     | 6    |
| 34 | 32 or 33                                                                                                                                                      | 52   |
| 35 | 25 and 34                                                                                                                                                     | 9    |
| 36 | 16 and 19                                                                                                                                                     | 2    |
| 37 | 31 or 35 or 36                                                                                                                                                | 12   |



|     |                                                                                                                                            |      |
|-----|--------------------------------------------------------------------------------------------------------------------------------------------|------|
| #1  | ("my5-fu" or My5-FU* or "my5 fu" or "my 5fu" or "my 5 fu"):ti,ab,kw                                                                        | 0    |
| #2  | ondose:ti,ab,kw                                                                                                                            | 0    |
| #3  | saladax:ti,ab,kw                                                                                                                           | 0    |
| #4  | #1 or #2 or #3                                                                                                                             | 0    |
| #5  | (myriad next genetic*):ti,ab,kw                                                                                                            | 2    |
| #6  | [mh immunoassay]                                                                                                                           | 4017 |
| #7  | (immunoassay* or (immun* near/2 assay*)):ti,ab,kw                                                                                          | 4787 |
| #8  | #6 or #7                                                                                                                                   | 6316 |
| #9  | [mh ^"Chromatography, High Pressure Liquid"]                                                                                               | 2376 |
| #10 | ("high performance liquid chromatography"):ti,ab,kw                                                                                        | 2356 |
| #11 | HPLC:ti,ab,kw                                                                                                                              | 2450 |
| #12 | ("high pressure liquid chromatography"):ti,ab,kw                                                                                           | 388  |
| #13 | ("high speed liquid chromatography"):ti,ab,kw                                                                                              | 1    |
| #14 | #9 or #10 or #11 or #12 or #13                                                                                                             | 5409 |
| #15 | [mh "Chromatography, Liquid"]                                                                                                              | 2788 |
| #16 | [mh "Mass Spectrometry"]                                                                                                                   | 1052 |
| #17 | #15 and #16                                                                                                                                | 581  |
| #18 | ("liquid chromatography-mass spectrometry"):ti,ab,kw                                                                                       | 157  |
| #19 | ("LC-MS" or LCMS* or "LC MS"):ti,ab,kw                                                                                                     | 443  |
| #20 | ("HPLC-MS" or HPLCMS* or "HPLC MS"):ti,ab,kw                                                                                               | 105  |
| #21 | #18 or #19 or #20                                                                                                                          | 651  |
| #22 | ((pharmacokinetic* or PK) near/2 (dosage* or dose* or dosing or adjust* or adapt* or monitor* or select* or calculat* or guided)):ti,ab,kw | 2463 |
| #23 | [mh Fluorouracil/PK]                                                                                                                       | 68   |

|     |                                                                                                                                                                                                                                                                                        |       |
|-----|----------------------------------------------------------------------------------------------------------------------------------------------------------------------------------------------------------------------------------------------------------------------------------------|-------|
| #24 | [mh Fluorouracil]                                                                                                                                                                                                                                                                      | 3825  |
| #25 | (fluorouracil* or 5-fluorouracil* or 5fluorouracil*):ti,ab,kw                                                                                                                                                                                                                          | 5908  |
| #26 | ("5 fu" or 5fu* or fu):ti,ab,kw                                                                                                                                                                                                                                                        | 2903  |
| #27 | #24 or #25 or #26                                                                                                                                                                                                                                                                      | 7097  |
| #28 | [mh "Dose-Response Relationship, Drug"]                                                                                                                                                                                                                                                | 24110 |
| #29 | [mh "Drug Dosage Calculations"]                                                                                                                                                                                                                                                        | 66    |
| #30 | [mh ^"Drug Monitoring"]                                                                                                                                                                                                                                                                | 1032  |
| #31 | [mh ^"Metabolic Clearance Rate"]                                                                                                                                                                                                                                                       | 1544  |
| #32 | ((dose* or dosing or dosage* or fluorouracil* or 5-fluorouracil* or 5fluorouracil* or "5-fu" or 5fu*) near/2 (adjust* or adapt* or monitor* or select* or calculat* or intensi* or escalat* or modif* or reduc* or concentration* or level* or limit* or detect* or measur*)):ti,ab,kw | 14997 |
| #33 | ((drug* or blood or plasma) near/5 (monitor* or concentration* or level*) near/5 (fluorouracil* or 5-fluorouracil* or 5fluorouracil* or "5-fu" or 5fu* or fu)):ti,ab,kw                                                                                                                | 47    |
| #34 | ("optimal drug therapy" or ("optimal drug" next (dosage* or dose* or dosing))):ti,ab,kw                                                                                                                                                                                                | 44    |
| #35 | #28 or #29 or #30 or #31 or #32 or #33 or #34                                                                                                                                                                                                                                          | 37921 |
| #36 | [mh ^"Individualized Medicine"]                                                                                                                                                                                                                                                        | 78    |
| #37 | ((personal* or individual*) near/2 (chemotherap* or dosage* or dose* or dosing)):ti,ab,kw                                                                                                                                                                                              | 771   |
| #38 | #36 or #37                                                                                                                                                                                                                                                                             | 843   |
| #39 | #35 or #38                                                                                                                                                                                                                                                                             | 38431 |
| #40 | #5 and #27                                                                                                                                                                                                                                                                             | 1     |
| #41 | #5 and #39                                                                                                                                                                                                                                                                             | 0     |
| #42 | #40 or #41                                                                                                                                                                                                                                                                             | 1     |

|     |                                                              |    |
|-----|--------------------------------------------------------------|----|
| #43 | #8 and #27 and #39                                           | 5  |
| #44 | ((("5-fu" or 5fu* or fu) next (plasma next assay*)):ti,ab,kw | 0  |
| #45 | #23 and #39                                                  | 45 |
| #46 | #4 or #42 or #43 or #44 or #45                               | 51 |
| #47 | #14 and #27                                                  | 29 |
| #48 | #21 and #27                                                  | 4  |
| #49 | #47 or #48                                                   | 33 |
| #50 | #39 and #49                                                  | 17 |
| #51 | #22 and #27                                                  | 15 |
| #52 | #46 or #50 or #51                                            | 67 |

All Results (67)

Cochrane Reviews (0)

Trials (65)

Methods Studies (0)

Technology Assessments (2)

Economic Evaluations (0)

Cochrane Groups (0)

**SCI and SSCI via Web of Science searched on 09/01/2014**

|      |                                                                        |     |
|------|------------------------------------------------------------------------|-----|
| # 37 | #31 OR #35 OR #36<br>Databases=SCI-EXPANDED, CPCI-S Timespan=All years | 399 |
| # 36 | #16 AND #19<br>Databases=SCI-EXPANDED, CPCI-S Timespan=All years       | 156 |
| # 35 | #25 AND #34<br>Databases=SCI-EXPANDED, CPCI-S Timespan=All years       | 228 |

|      |                                                                                                                                          |         |
|------|------------------------------------------------------------------------------------------------------------------------------------------|---------|
| # 34 | #32 OR #33<br>Databases=SCI-EXPANDED, CPCI-S Timespan=All years                                                                          | 731     |
| # 33 | #15 AND #19<br>Databases=SCI-EXPANDED, CPCI-S Timespan=All years                                                                         | 96      |
| # 32 | #11 AND #19<br>Databases=SCI-EXPANDED, CPCI-S Timespan=All years                                                                         | 680     |
| # 31 | #4 OR #28 OR #29 OR #30<br>Databases=SCI-EXPANDED, CPCI-S Timespan=All years                                                             | 40      |
| # 30 | TS=((5-fu* OR 5fu* OR fu) NEAR/1 (plasma NEAR/1 assay*))<br>Databases=SCI-EXPANDED, CPCI-S Timespan=All years                            | 2       |
| # 29 | #6 AND #19 AND #25<br>Databases=SCI-EXPANDED, CPCI-S Timespan=All years                                                                  | 34      |
| # 28 | #26 OR #27<br>Databases=SCI-EXPANDED, CPCI-S Timespan=All years                                                                          | 3       |
| # 27 | #5 AND #25<br>Databases=SCI-EXPANDED, CPCI-S Timespan=All years                                                                          | 2       |
| # 26 | #5 AND #19<br>Databases=SCI-EXPANDED, CPCI-S Timespan=All years                                                                          | 2       |
| # 25 | #23 OR #24<br>Databases=SCI-EXPANDED, CPCI-S Timespan=All years                                                                          | 131,943 |
| # 24 | TS=((personal* OR individual*) NEAR/2 (chemotherap* OR dosage* OR dose* OR dosing))<br>Databases=SCI-EXPANDED, CPCI-S Timespan=All years | 6,959   |
| # 23 | #20 OR #21 OR #22                                                                                                                        | 127,286 |

|      |                                                                                                                                                                                                                                                                                                                                          |         |
|------|------------------------------------------------------------------------------------------------------------------------------------------------------------------------------------------------------------------------------------------------------------------------------------------------------------------------------------------|---------|
|      | Databases=SCI-EXPANDED, CPCI-S Timespan=All years                                                                                                                                                                                                                                                                                        |         |
| # 22 | TS=("optimal drug therapy" OR ("optimal drug" NEAR/1 (dosage* OR dose* OR dosing)))<br><br>Databases=SCI-EXPANDED, CPCI-S Timespan=All years                                                                                                                                                                                             | 186     |
| # 21 | TS=((drug* OR blood OR plasma) NEAR/5 (monitor* OR concentration* OR level*) NEAR/5 (fluorouracil* OR 5-fluorouracil* OR 5fluorouracil* OR 5-fu* OR 5fu* OR fu))<br><br>Databases=SCI-EXPANDED, CPCI-S Timespan=All years                                                                                                                | 415     |
| # 20 | TS=((dose* OR dosing OR dosage* OR fluorouracil* OR 5-fluorouracil* OR 5fluorouracil* OR 5-fu* OR 5fu*) NEAR/2 (adjust* OR adapt* OR monitor* OR select* OR calculat* OR intensi* OR escalat* OR modif* OR reduc* OR concentration* OR level* OR limit* OR detect* OR measur*))<br><br>Databases=SCI-EXPANDED, CPCI-S Timespan=All years | 127,025 |
| # 19 | #17 OR #18<br><br>Databases=SCI-EXPANDED, CPCI-S Timespan=All years                                                                                                                                                                                                                                                                      | 46,445  |
| # 18 | TS=(5-fu* OR 5fu* OR fu)<br><br>Databases=SCI-EXPANDED, CPCI-S Timespan=All years                                                                                                                                                                                                                                                        | 22,299  |
| # 17 | TS=(fluorouracil* OR 5-fluorouracil* OR 5fluorouracil*)<br><br>Databases=SCI-EXPANDED, CPCI-S Timespan=All years                                                                                                                                                                                                                         | 34,612  |
| # 16 | TS=((pharmacokinetic* OR PK) NEAR/2 (dosage* OR dose* OR dosing OR adjust* OR adapt* OR monitor* OR select* OR calculat* OR guided))<br><br>Databases=SCI-EXPANDED, CPCI-S Timespan=All years                                                                                                                                            | 11,242  |
| # 15 | #12 OR #13 OR #14<br><br>Databases=SCI-EXPANDED, CPCI-S Timespan=All years                                                                                                                                                                                                                                                               | 38,936  |
| # 14 | TS=HPLC\$MS*<br><br>Databases=SCI-EXPANDED, CPCI-S Timespan=All years                                                                                                                                                                                                                                                                    | 2       |

|      |                                                                                                              |         |
|------|--------------------------------------------------------------------------------------------------------------|---------|
| # 13 | TS=LC\$MS*<br>Databases=SCI-EXPANDED, CPCI-S Timespan=All years                                              | 44      |
| # 12 | TS=("liquid chromatography" NEAR/3 "mass spectrometry")<br>Databases=SCI-EXPANDED, CPCI-S Timespan=All years | 38,898  |
| # 11 | #7 OR #8 OR #9 OR #10<br>Databases=SCI-EXPANDED, CPCI-S Timespan=All years                                   | 185,457 |
| # 10 | TS="high speed liquid chromatography"<br>Databases=SCI-EXPANDED, CPCI-S Timespan=All years                   | 300     |
| # 9  | TS="high pressure liquid chromatography"<br>Databases=SCI-EXPANDED, CPCI-S Timespan=All years                | 7,726   |
| # 8  | TS=HPLC<br>Databases=SCI-EXPANDED, CPCI-S Timespan=All years                                                 | 135,862 |
| # 7  | TS="high performance liquid chromatography"<br>Databases=SCI-EXPANDED, CPCI-S Timespan=All years             | 79,350  |
| # 6  | TS=(immunoassay* OR (immun* NEAR/2 assay*))<br>Databases=SCI-EXPANDED, CPCI-S Timespan=All years             | 158,922 |
| # 5  | TS=(myriad NEAR/1 genetic*)<br>Databases=SCI-EXPANDED, CPCI-S Timespan=All years                             | 106     |
| # 4  | #1 OR #2 OR #3<br>Databases=SCI-EXPANDED, CPCI-S Timespan=All years                                          | 4       |
| # 3  | TS=saladax<br>Databases=SCI-EXPANDED, CPCI-S Timespan=All years                                              | 2       |
| # 2  | TS=ondose<br>Databases=SCI-EXPANDED, CPCI-S Timespan=All years                                               | 2       |

|     |                                                                                                                               |   |
|-----|-------------------------------------------------------------------------------------------------------------------------------|---|
| # 1 | TS=((my5-fu*) OR (My5-FU*) OR "my5 fu" OR (my NEAR/1 5fu*) or "my 5 fu")<br>Databases=SCI-EXPANDED, CPCI-S Timespan=All years | 1 |
|-----|-------------------------------------------------------------------------------------------------------------------------------|---|
