# Supplementary material for: Is monitoring of plasma 5-fluorouracil levels in metastatic / advanced colorectal cancer clinically effective? A systematic review
Source: PubMed Central journal article supplement (PMC4960837; doi:10.1186/s12885-016-2581-x), 2016-07-25

**ADDITIONAL FILE 2. PRISMA Flow Diagram of studies included**

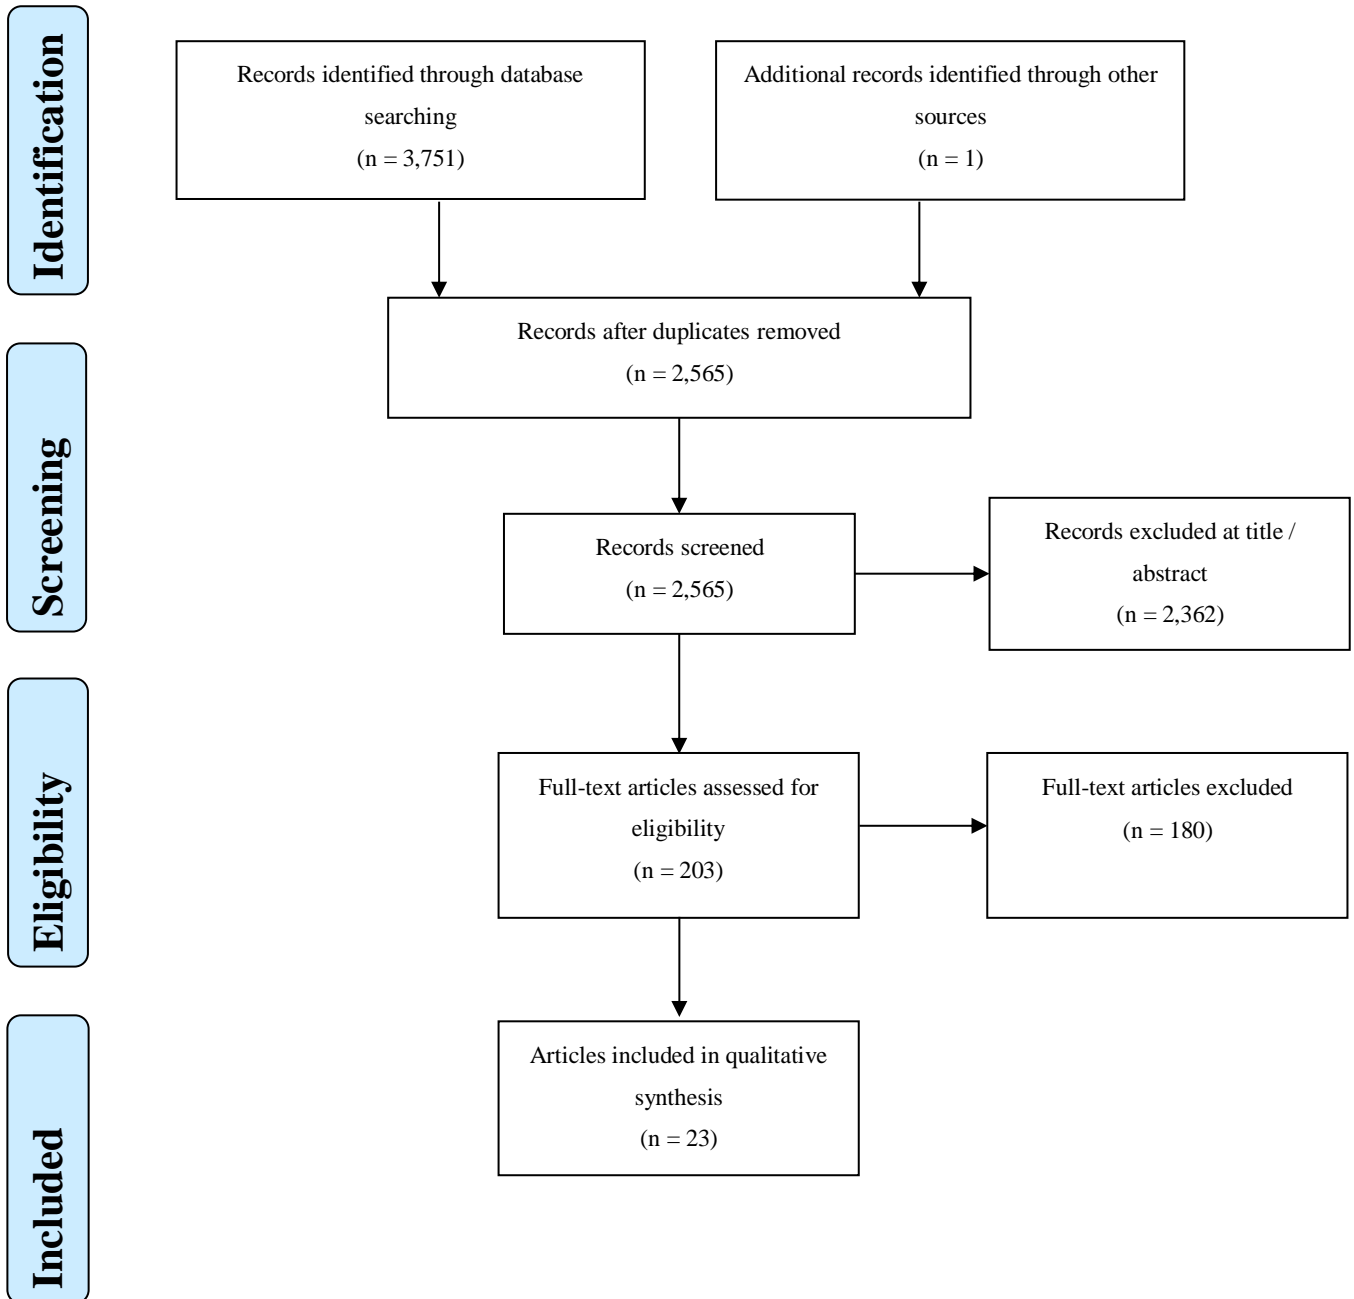

Supplement: 12885_2016_2581_MOESM2_ESM.pdf [file 12885_2016_2581_MOESM2_ESM.pdf]
