# Supplementary material for: Is monitoring of plasma 5-fluorouracil levels in metastatic / advanced colorectal cancer clinically effective? A systematic review
Source: PubMed Central journal article supplement (PMC4960837; doi:10.1186/s12885-016-2581-x), 2016-07-25
Supplement: 12885_2016_2581_MOESM3_ESM.pdf [file 12885_2016_2581_MOESM3_ESM.pdf]

### ADDITIONAL FILE 3

**Table 1. Characteristics of included pharmacokinetic dose adjustment studies**

| First author, date, country.<br><i>Study design</i>                                     | Regimen                                                              | Algorithm<br><i>5-fluorouracil assay</i> | N pharmacokinetic<br><i>N body surface area</i> | 5-fluorouracil<br>related<br>adverse<br>events | Overall response<br>rate (%)                                           | Overall survival<br>median (months)<br><i>KM</i>           | Progression-free survival<br>median (months)<br><i>KM</i>  |
|-----------------------------------------------------------------------------------------|----------------------------------------------------------------------|------------------------------------------|-------------------------------------------------|------------------------------------------------|------------------------------------------------------------------------|------------------------------------------------------------|------------------------------------------------------------|
| <b>Studies with both pharmacokinetic and body surface area arms</b>                     |                                                                      |                                          |                                                 |                                                |                                                                        |                                                            |                                                            |
| Gamelin, 2008[35] France.<br><i>RCT</i>                                                 | 5-fluorouracil (8h inf)<br>+ FA                                      | Gamelin 1996[24]<br><i>HPLC</i>          | 104<br><i>104</i>                               | Risk                                           | pharmacokinetic<br>35/104 (33.6)<br>body surface area<br>18/104 (17.3) | 16 body surface area   22<br>pharmacokinetic<br><i>Yes</i> | NR<br><i>No</i>                                            |
| Capitain, 2012[36] France.<br><i>Retrospective case series +<br/>historical control</i> | FOLFOX6                                                              | Gamelin 1996[24]<br><i>HPLC</i>          | 118<br><i>39</i>                                | Risk                                           | pharmacokinetic<br>83/118 (69.7)<br>body surface<br>area 18/39 (46.6)  | 22 body surface area   28<br>pharmacokinetic <i>Yes*</i>   | 10 body surface area   16<br>pharmacokinetic <i>Yes*</i>   |
| Kline, 2014[37] USA.<br><i>Retrospective with two self-<br/>selected groups</i>         | FOLFOX6<br>or FOLFIRI                                                | Unclear<br><i>My5-FU</i>                 | 19<br><i>30</i>                                 | Risk¶                                          | NR                                                                     | No<br><i>No</i>                                            | 10 body surface area   14<br>pharmacokinetic<br><i>Yes</i> |
| <b>Studies with only a pharmacokinetic arm</b>                                          |                                                                      |                                          |                                                 |                                                |                                                                        |                                                            |                                                            |
| Capitain, 2008[20]<br>France. <i>Case series</i>                                        | 5-fluorouracil + FA<br>(5-fluorouracil+LV, &<br>modified de Gramont) | Gamelin 1996[24]<br><i>HPLC</i>          | 76                                              | Risk §                                         | 25/76<br>(32.9)                                                        | 20<br><i>Yes</i>                                           | 3.28<br><i>No</i>                                          |
| Gamelin, 1996[24]<br>France <i>Prospective case<br/>series (phase II study)</i>         | 5-fluorouracil (8h inf)                                              | None<br><i>HPLC</i>                      | 40                                              | Risk                                           | 18/40<br>(45)                                                          | 14<br><i>Yes</i>                                           | Unclear<br><i>Yes</i>                                      |
| Gamelin, 1998[25]<br>France <i>Prospective case<br/>series (multicentre phase II)</i>   | 5-fluorouracil (8h inf)                                              | Gamelin 1996[24]<br><i>HPLC</i>          | 152                                             | Counts                                         | 66/117<br>(56.4)                                                       | 19<br><i>Yes</i>                                           | 11<br><i>Yes</i>                                           |
| Boisdron-Celle, 2002[19]<br>France. <i>Prospective case<br/>series</i>                  | 5-fluorouracil + FA (+<br>platin<br>post progression)                | Gamelin 1996[24]<br><i>HPLC</i>          | 29                                              | Counts §§                                      | 7/27<br>(25.9)                                                         | NR<br><i>No</i>                                            | NR<br><i>No</i>                                            |
| Cattel, 2003[21]<br>Italy. <i>Prospective case series</i>                               | 5-fluorouracil (14 day<br>inf) + platin                              | None<br><i>HPLC</i>                      | 13                                              | No                                             | 7/13<br>(53)                                                           | 9.6<br><i>No</i>                                           | 7<br><i>No</i>                                             |
| Duffeur, 2010[22]<br>France. <i>Retrospective<br/>database analysis</i>                 | De Gramont (LV 5-<br>fluorouracil2)                                  | Ychou 2003[33]<br><i>HPLC</i>            | 103                                             | Risk                                           | young 15/55 (27)<br>elderly 17/48 (35)                                 | young 18.7<br>elderly 13.4<br><i>No</i>                    | NR<br><i>No</i>                                            |
| Findlay, 1996[23]<br>UK. <i>Case series</i>                                             | 5-fluorouracil (not<br>specified)                                    | None<br><i>HPLC</i>                      | 19                                              | Risk §                                         | 8/19<br>(42)                                                           | No<br><i>No</i>                                            | NR<br><i>No</i>                                            |
| Ho, 2011[26]<br>China <i>Prospective case<br/>series</i>                                | 5-fluorouracil (48h<br>infusion) + FA                                | None<br><i>HPLC</i>                      | 16                                              | Counts                                         | 3/16<br>(18.8)                                                         | 10.5<br><i>No</i>                                          | 4.1<br><i>No</i>                                           |
| Jodrell, 2001[27] UK<br><i>Prospective case series and<br/>simulation study</i>         | 5-fluorouracil<br>(protracted 1-26<br>weeks)                         | None<br><i>HPLC</i>                      | 61                                              | Risk §                                         | 16/61<br>(26)                                                          | 11<br><i>No</i>                                            | NR<br><i>No</i>                                            |

| First author, date, country.<br><i>Study design</i>        | Regimen                                                                         | Algorithm<br><i>5-fluorouracil assay</i> | N pharmacokinetic<br><i>N body surface area</i> | 5-fluorouracil<br>related<br>adverse<br>events | Overall response<br>rate (%) | Overall survival<br>median (months)<br><i>KM</i> | Progression-free survival<br>median (months)<br><i>KM</i> |
|------------------------------------------------------------|---------------------------------------------------------------------------------|------------------------------------------|-------------------------------------------------|------------------------------------------------|------------------------------|--------------------------------------------------|-----------------------------------------------------------|
| Kline, 2011[28]<br>USA <i>Case series</i>                  | FOLFOX6 +<br>Avastatin, FOLFOX6,<br>FOLFIRI, FOLFOX4                            | Unclear<br><i>My5-FU</i>                 | 21                                              | NR                                             | NR                           | NR<br><i>No</i>                                  | NR<br><i>No</i>                                           |
| Metzger, 1994[29]<br>France <i>RCT*</i>                    | 5-fluorouracil (5-day<br>infusion, flat or<br>chronomodulated) +<br>FA + platin | None<br><i>HPLC</i>                      | 9                                               | Risk §§§                                       | NR                           | NR<br><i>No</i>                                  | No<br><i>No</i>                                           |
| Milano, 1988[30]<br>France <i>Prospective case series</i>  | 5-fluorouracil (5-day<br>continuous infusion)                                   | None<br><i>HPLC</i>                      | 26                                              | Counts ¶                                       | 3/26<br><i>(12)</i>          | NR<br><i>No</i>                                  | NR<br><i>No</i>                                           |
| Stremetzne, 1999[31]<br>Germany <i>RCT*</i>                | 5-fluorouracil (5-day<br>continuous) + FA                                       | None<br><i>HPLC</i>                      | 16                                              | Risk §                                         | 0/16<br><i>(0)</i>           | NR<br><i>No</i>                                  | NR<br><i>No</i>                                           |
| Ychou, 1999[32]<br>France <i>Prospective case series</i>   | de Gramont (LV55-<br>fluorouracil2)                                             | tested 2<br>algorithms <i>HPLC</i>       | 38                                              | Risk &<br>Counts                               | Unclear                      | NR<br><i>No</i>                                  | NR<br><i>No</i>                                           |
| Ychou, 2003[33]<br>France. <i>Prospective case series</i>  | de Gramont (LV55-<br>fluorouracil2)                                             | Ychou, 1999[32]<br><i>HPLC</i>           | 53                                              | Risk ¶¶                                        | 19/52<br><i>(36.5)</i>       | 18.6<br><i>No</i>                                | 7<br><i>No</i>                                            |
| Yoshida, 1990[34]<br>Japan. <i>Prospective case series</i> | 5-fluorouracil                                                                  | None<br><i>HPLC</i>                      | 19                                              | Risk§ (Total<br>toxicities<br>only)            | 10/19<br><i>(53)</i>         | NR<br><i>No</i>                                  | NR<br><i>No</i>                                           |

LV = leukovorin = FA = folinic acid; inf = infusion; NR = not reported; HPLC = High Performance Liquid Chromatography. All studies included advanced / metastatic colorectal cancer patients; Kline stratified according stage II/III or stage IV (data applies for stage IV); \* studies randomised patients to two different dose regimens of folinate; ¶ Grade 3 or deemed sufficiently serious by the physician to warrant a dose reduction and “designated as adverse effects”; § time of assessment unclear; §§ reported extensively but irregularities in numbers reported §§§ inconsistent grouping of toxicity grades; ¶ grouping grade I+II & III+IV; ¶¶ grouping Cutaneous and Haematological III+IV, Digestive and mucositis III+IV; HPLC = high performance liquid chromatography
