# Supplementary material for: Is monitoring of plasma 5-fluorouracil levels in metastatic / advanced colorectal cancer clinically effective? A systematic review
Source: PubMed Central journal article supplement (PMC4960837; doi:10.1186/s12885-016-2581-x), 2016-07-25
Supplement: 12885_2016_2581_MOESM4_ESM.pdf [file 12885_2016_2581_MOESM4_ESM.pdf]

**ADDITIONAL FILE 4. Characteristics of studies testing if My5-FU is clinically equivalent to LC-MS/MS**

| Study<br><i>Sample N</i><br><i>Source</i>                                 | Range of<br>plasma<br>concentrations<br>* (ng/mL) | Correlation                                                   | Automation of<br>My5-FU assay          | Bland-Altman Plot    |                                         |                  |
|---------------------------------------------------------------------------|---------------------------------------------------|---------------------------------------------------------------|----------------------------------------|----------------------|-----------------------------------------|------------------|
|                                                                           |                                                   |                                                               |                                        | Bias (95%CI)         | Lower & upper<br>limits of<br>agreement | Largest outliers |
| Buchel, 2013[38]<br>247<br><i>GI cancers</i>                              | 93 to 17881                                       | R <sup>2</sup> =0.99**<br>Slope 1.08 (95% CI<br>1.06 to 1.09) | Roche Cobas<br>Integra 800<br>analyser | 7.0% (5.5 to<br>8.5) | -18% 30% §§                             | -50% +95% §§     |
| Beumer, 2009[15]<br>156<br><i>Head and Neck and colorectal<br/>cancer</i> | 93-1774                                           | R <sup>2</sup> =0.97<br>Slope 1.035<br>Intercept<br>10.9ng/mL | Olympus AU400<br>analyser              | + 23ng/mL<br>(NR)    | NR                                      | -35% +52% §§     |
| Makihara 2012[39]<br>50<br><i>colorectal cancer</i> §                     | 41-457                                            | R <sup>2</sup> =0.8471                                        | None or NR                             | NR                   | NR                                      | NR               |

*\*as measured by the index test; \*\*Passing-Bablok regression[52] ; § patients received prodrug; §§ read from plot ,capecitabine; NR = not reported;*
