# Supplementary material for: Is monitoring of plasma 5-fluorouracil levels in metastatic / advanced colorectal cancer clinically effective? A systematic review
Source: PubMed Central journal article supplement (PMC4960837; doi:10.1186/s12885-016-2581-x), 2016-07-25
Supplement: 12885_2016_2581_MOESM5_ESM.pdf [file 12885_2016_2581_MOESM5_ESM.pdf]

**ADDITIONAL FILE 5. Dose adjustment algorithms based on plasma 5-fluorouracil measurement in colorectal cancer patients**

| <b>Gamelin et al. (1996)[24] : 8 hour 5-fluorouracil infusion regimen + FA; initial dose 1,500 mg/m<sup>2</sup></b> |                   |                          |                                     |                   |                         |                                                                                                  |
|---------------------------------------------------------------------------------------------------------------------|-------------------|--------------------------|-------------------------------------|-------------------|-------------------------|--------------------------------------------------------------------------------------------------|
| <i>Plasma 5-fluorouracil (µg/L)</i>                                                                                 | <b>AUC mg*H/L</b> | <b>Dose change § (%)</b> | <i>Plasma 5-fluorouracil (µg/L)</i> | <b>AUC mg*H/L</b> | <b>Dose change§ (%)</b> | <b>In case of toxicity</b>                                                                       |
| <500                                                                                                                | <4                | +50%                     | 1800-2000                           | 14.4-16           | +5%                     | Grade 2 toxicity: 200mg dose decrease<br>Grade 3 toxicity: 1 week break then 300mg dose decrease |
| 500-1000                                                                                                            | 4-8               | +40%                     | <b>2000-3000</b>                    | <b>16-24</b>      | <b>None</b>             |                                                                                                  |
| 1000-1300                                                                                                           | 8-10.4            | +30%                     | 3000-3200                           | 24-25.6           | -5%                     |                                                                                                  |
| 1300-1500                                                                                                           | 10.4-12           | +20%                     | 3200-3500                           | 25.6-28           | -10%                    |                                                                                                  |
| 1500-1800                                                                                                           | 12-14.4           | +10%                     | >3500                               | >28               | -30%                    |                                                                                                  |

§ percentage change from previous cycle dose; H = hours of 5-fluorouracil infusion

| <b>Kaldate et al. (2012)<sup>[40]</sup> : 46 hour 5-fluorouracil infusion + oxaloplatin + FA; initial dose 2,400 to 3,000 mg/m<sup>2</sup> after a 400 mg/m<sup>2</sup> bolus</b> |                      |                                          |                                       |                      |                                          |
|-----------------------------------------------------------------------------------------------------------------------------------------------------------------------------------|----------------------|------------------------------------------|---------------------------------------|----------------------|------------------------------------------|
| <i>Plasma 5-fluorouracil (µg/L) ¥</i>                                                                                                                                             | <b>AUC §§ mg*H/L</b> | <b>Change in dose (mg/m<sup>2</sup>)</b> | <i>Plasma 5-fluorouracil (µg/L) ¥</i> | <b>AUC §§ mg*H/L</b> | <b>Change in dose (mg/m<sup>2</sup>)</b> |
| 174-217                                                                                                                                                                           | 8-10                 | ↑727                                     |                                       |                      |                                          |
| 239-283                                                                                                                                                                           | 11-13                | ↑582                                     | 672-717                               | 31-33                | ↓291                                     |
| 304-348                                                                                                                                                                           | 14-16                | ↑436                                     | 739-783                               | 34-36                | ↓436                                     |
| 370-413                                                                                                                                                                           | 17-19                | ↑291                                     | 804-848                               | 37-39                | ↓582                                     |
| 435-652                                                                                                                                                                           | <b>20-30</b>         | <b>None</b>                              | 870                                   | ≥40                  | ↓727                                     |

¥ Calculated assuming infusion of 46 hours; §§ area under the curve of previous cycle; H = hours of 5-fluorouracil infusion

| <b>Ychou et al. (1999)[32] 400 mg/ m<sup>2</sup> bolus 5-fluorouracil; then a 22 hour infusion of 600 mg/ m<sup>2</sup> 5-fluorouracil repeated the next day; +FA</b> |                            |
|-----------------------------------------------------------------------------------------------------------------------------------------------------------------------|----------------------------|
| <b>AUC §§§ mg*H/L*m<sup>2</sup></b>                                                                                                                                   | <b>Dose increase § (%)</b> |
| ≤5                                                                                                                                                                    | 150%                       |
| 5<AUC≤10                                                                                                                                                              | 100%                       |
| 10<AUC≤15                                                                                                                                                             | 50%                        |
| 15<AUC≤20                                                                                                                                                             | 25%                        |
| >20                                                                                                                                                                   | No increase                |
| §§§ note differently reported pharmacokinetic units and calculation for area under the curve relative to the other algorithms                                         |                            |
