# Supplementary material for: Is monitoring of plasma 5-fluorouracil levels in metastatic / advanced colorectal cancer clinically effective? A systematic review
Source: PubMed Central journal article supplement (PMC4960837; doi:10.1186/s12885-016-2581-x), 2016-07-25
Supplement: 12885_2016_2581_MOESM7_ESM.pdf [file 12885_2016_2581_MOESM7_ESM.pdf]

**ADDITIONAL FILE 7.**

**Modelled median and mean overall survival in pharmacokinetic and body surface area arms in studies of 5-fluorouracil+FA and FOLFOX6**

**Table 1 Overall survival time (months)**

| Body surface area overall survival 5-fluorouracil + FA |                |                       | Pharmacokinetic overall survival 5-fluorouracil + FA |                |                     |
|--------------------------------------------------------|----------------|-----------------------|------------------------------------------------------|----------------|---------------------|
| Study                                                  | Weibull median | Weibull mean (95% CI) | Study                                                | Weibull median | Weibull mean        |
|                                                        |                |                       | Gamelin 1998[25]                                     | 20.8           | 25.44 (21.80-29.44) |
|                                                        |                |                       | Capitain 2008[20]                                    | 18.4           | 23.44 (18.70-29.33) |
| Gamelin 2008[35]                                       | 17.0           | 19.64 (16.82-22.77)   | Gamelin 2008[35]                                     | 20.8           | 22.61 (19.65-25.85) |
| Cunningham 2009[46]                                    | 14.7           | 16.89 (16.82-22.77)   |                                                      |                |                     |
| Kohne 2005[44]                                         | 17.8           | 21.28 (18.72-24.27)   |                                                      |                |                     |
| Kohne 2003[43]                                         | 14.9           | 17.57 (15.20-22.36)   |                                                      |                |                     |
| Seymour 2007[45]                                       | 14.3           | 17.12 (15.95-18.39)   |                                                      |                |                     |
| Studies combined                                       | 15.2           | 18.0                  | Studies combined                                     | 20.2           | 24.1                |
|                                                        |                |                       |                                                      |                |                     |
| Body surface area overall survival FOLFOX 6            |                |                       | Pharmacokinetic overall survival FOLFOX 6            |                |                     |
| Study                                                  | Weibull median | Weibull mean          | Study                                                | Weibull median | Weibull mean        |
| COIN 2011[50]                                          | 16.1           | 18.32 (16.67-20.09)   |                                                      |                |                     |
| Seymour 2007[45]                                       | 15.7           | 18.10 (16.48-19.89)   |                                                      |                |                     |
| Hochster 2008[49]                                      | 20.5           | 22.98 (18.20-29.10)   |                                                      |                |                     |
| Ducreux 2011[48]                                       | 20.5           | 21.93 (19.73-24.27)   |                                                      |                |                     |
| Tournigand 2004[47]                                    | 22.6           | 28.19 (23.10-34.80)   |                                                      |                |                     |
| Capitain 2012[36]                                      | 22             | 24.5                  | Capitain 2012[36]                                    | 30.3           | 33.73 (29.21-38.93) |

**Table 2. Progression free survival time (PFS) (months)**

| Body surface area PFS 5-fluorouracil + FA |                         |                       | Pharmacokinetic PFS 5-fluorouracil + FA |                         |                       |
|-------------------------------------------|-------------------------|-----------------------|-----------------------------------------|-------------------------|-----------------------|
| Study                                     | Weibull median          | Weibull mean (95%CI)  | Study                                   | Weibull median (months) | Weibull mean (months) |
| Kohne 2003[43]                            | 6.1                     | 7.65 (6.58-8.90)      |                                         |                         |                       |
| Kohne 2005[44]                            | 6.0                     | 6.97 (6.24-7.77)      |                                         |                         |                       |
| Cunningham 2009[46]                       | 6.9                     | 8.21 (7.49-8.98)      |                                         |                         |                       |
|                                           |                         |                       | Gamelin 1998[25]                        | 8.7                     | 12.54 (10.35-15.23)   |
|                                           |                         |                       |                                         |                         |                       |
| Body surface area PFS FOLFOX 6            |                         |                       | Pharmacokinetic PFS FOLFOX6             |                         |                       |
|                                           | Weibull median (months) | Weibull mean (months) |                                         | Weibull median (months) | Weibull mean (months) |
| COIN 2011[50]                             | 8.7                     | 10.23 (9.24-11.29)    |                                         |                         |                       |
| Ducreux 2011[48]                          | 9.6                     | 11.41 (9.90-13.14)    |                                         |                         |                       |
| Tournigand 2004[47]                       | 8.9                     | 10.66 (9.01-12.59)    |                                         |                         |                       |
| Kline 2014[37]                            | 13.2                    | 17.91 (11.40-31.48)   | Kline 2014[37]                          | 18.0                    | 19.57 (13.49-29.06)   |
| Capitain 2012[20]                         | 10.0                    | 13.2                  | Capitain 2012[20]                       | 19.0                    | 25.07 (20.04-32.18)   |
