# Supplementary material for: Is monitoring of plasma 5-fluorouracil levels in metastatic / advanced colorectal cancer clinically effective? A systematic review
Source: Springer Nature journal article supplement (doi:10.1186/s12885-016-2581-x), 2016-07-25

**ADDITIONAL FILE 8.**

**Parametric models of overall survival and progression free survival in 5-fluorouracil+ folinate and FOLFOX6 regimens. Red lines = Weibull models, blue lines = lognormal models**

**Figure 1. Weibull and loglogistic fits to overall survival in FOLFOX 6 regimens.**

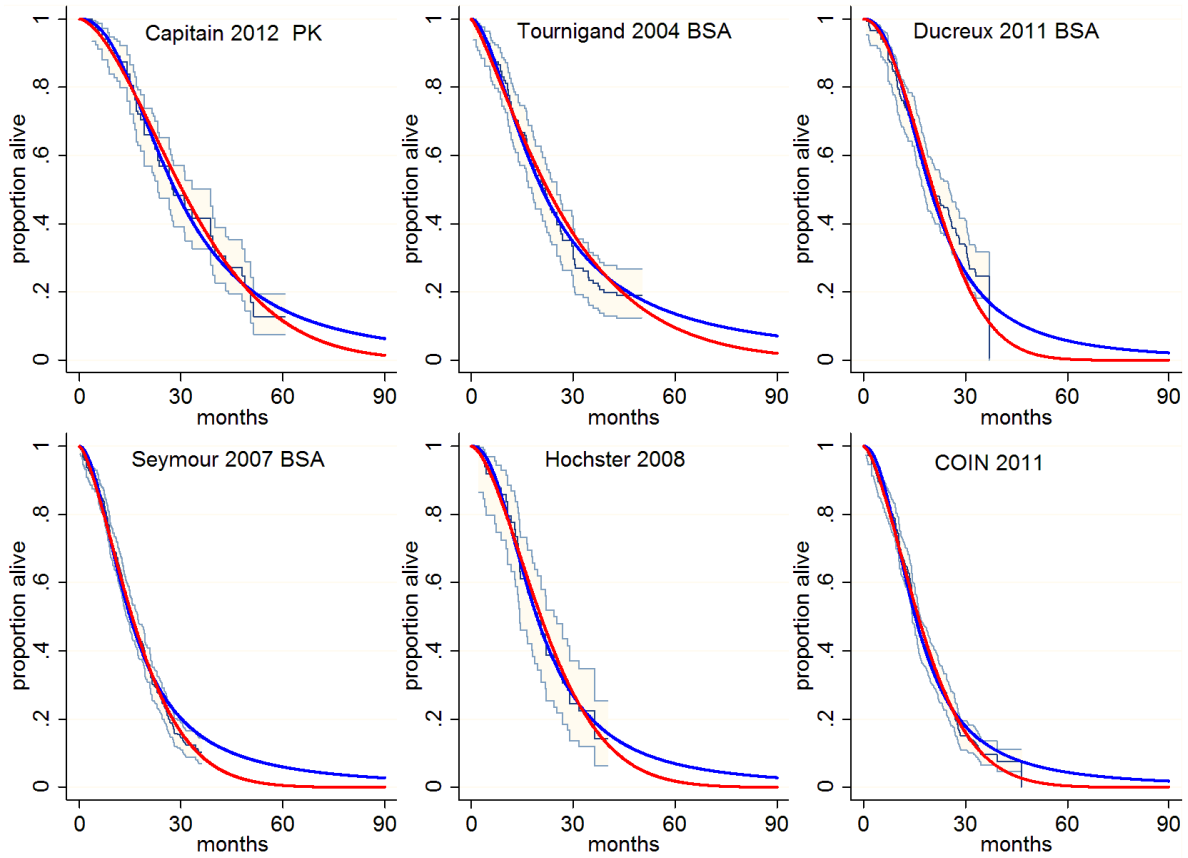

**Figure 2. Weibull and loglogistic fits to overall survival in 5-fluorouracil + FA regimens.**

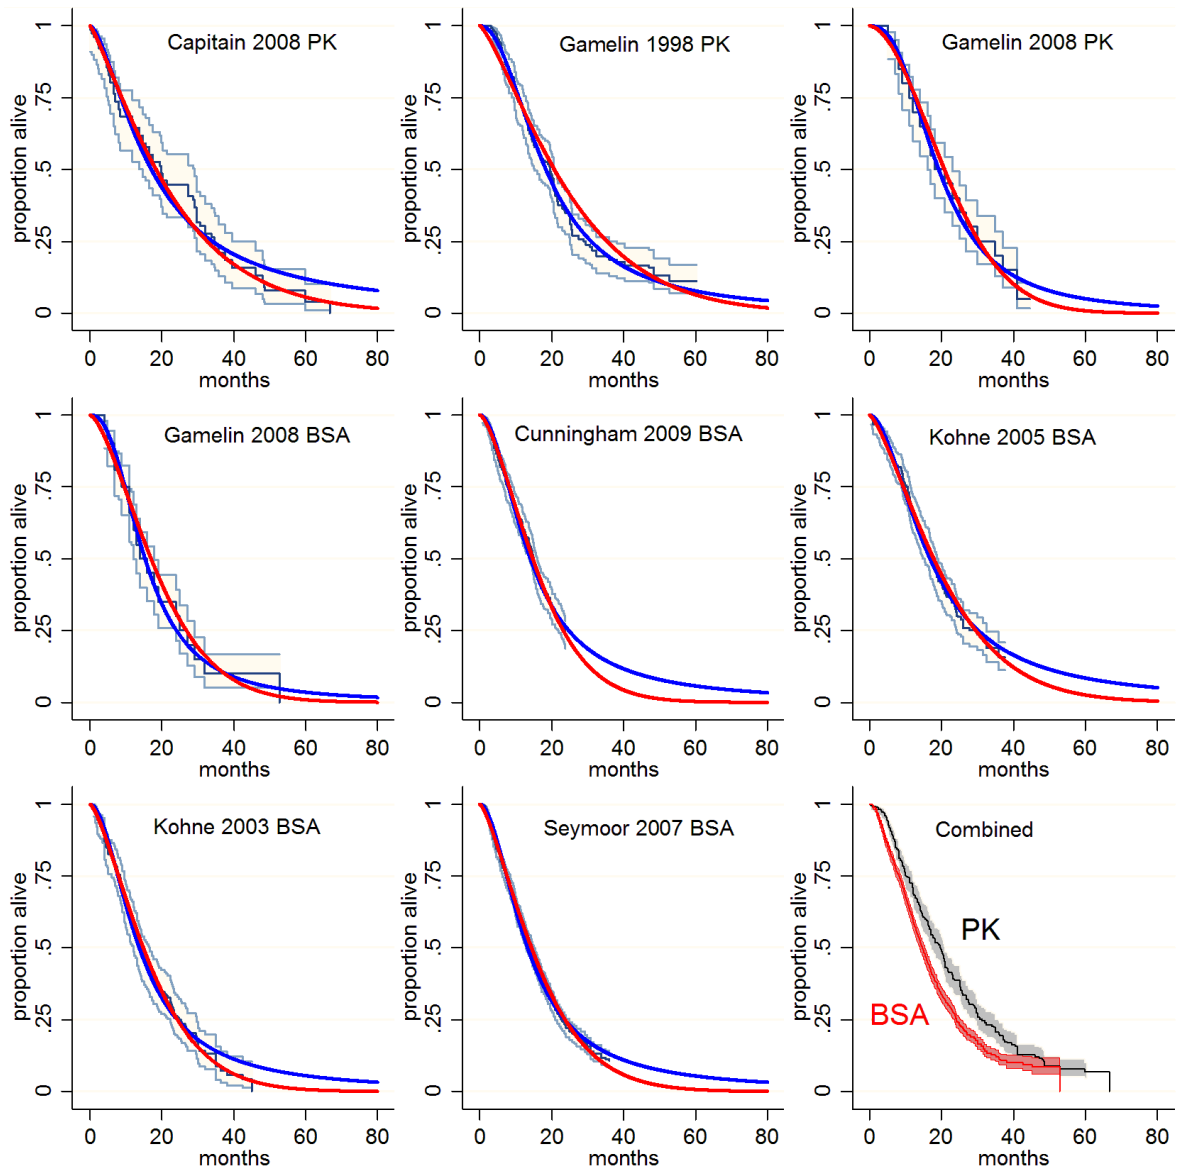

**Figure 3. Weibull and loglogistic fits to progression-free survival in FOLFOX 6 regimens.**

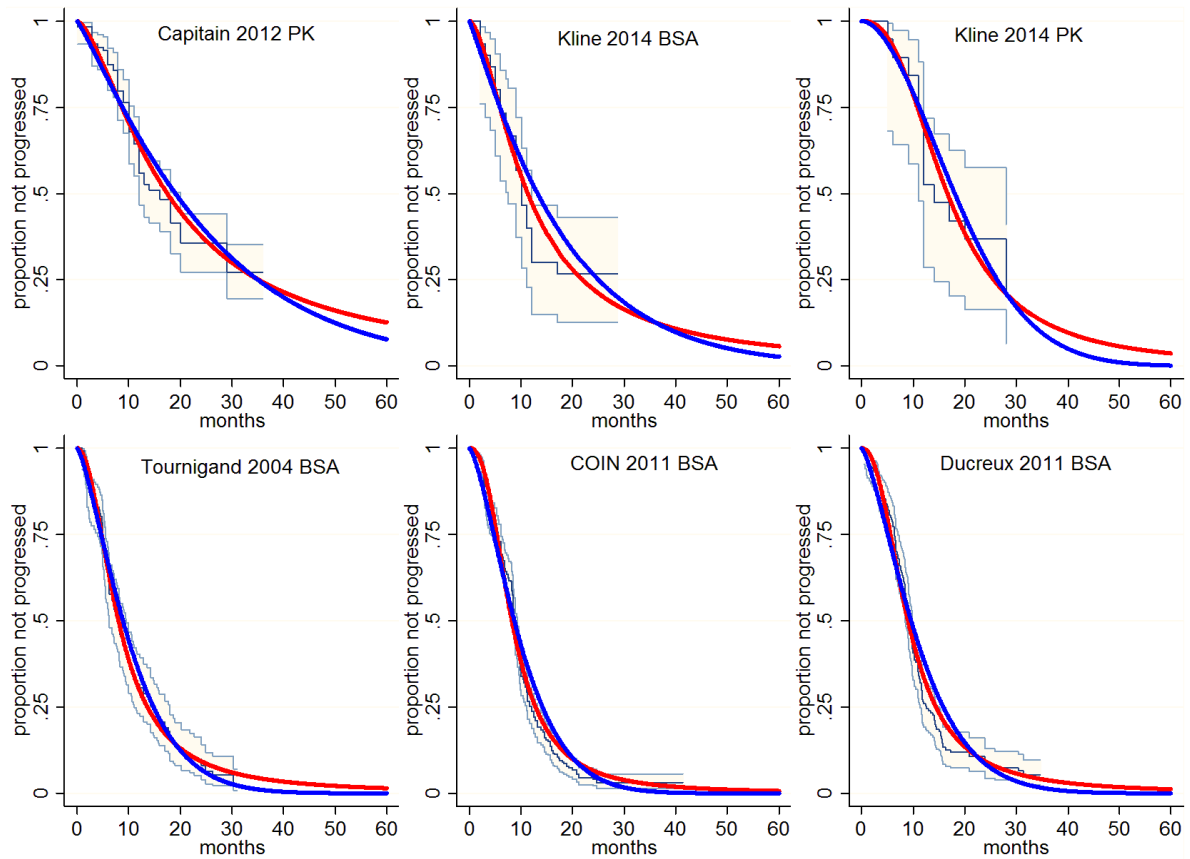

**Figure 4. Weibull and loglogistic fits to progression-free survival in 5-fluorouracil + FA regimens.**

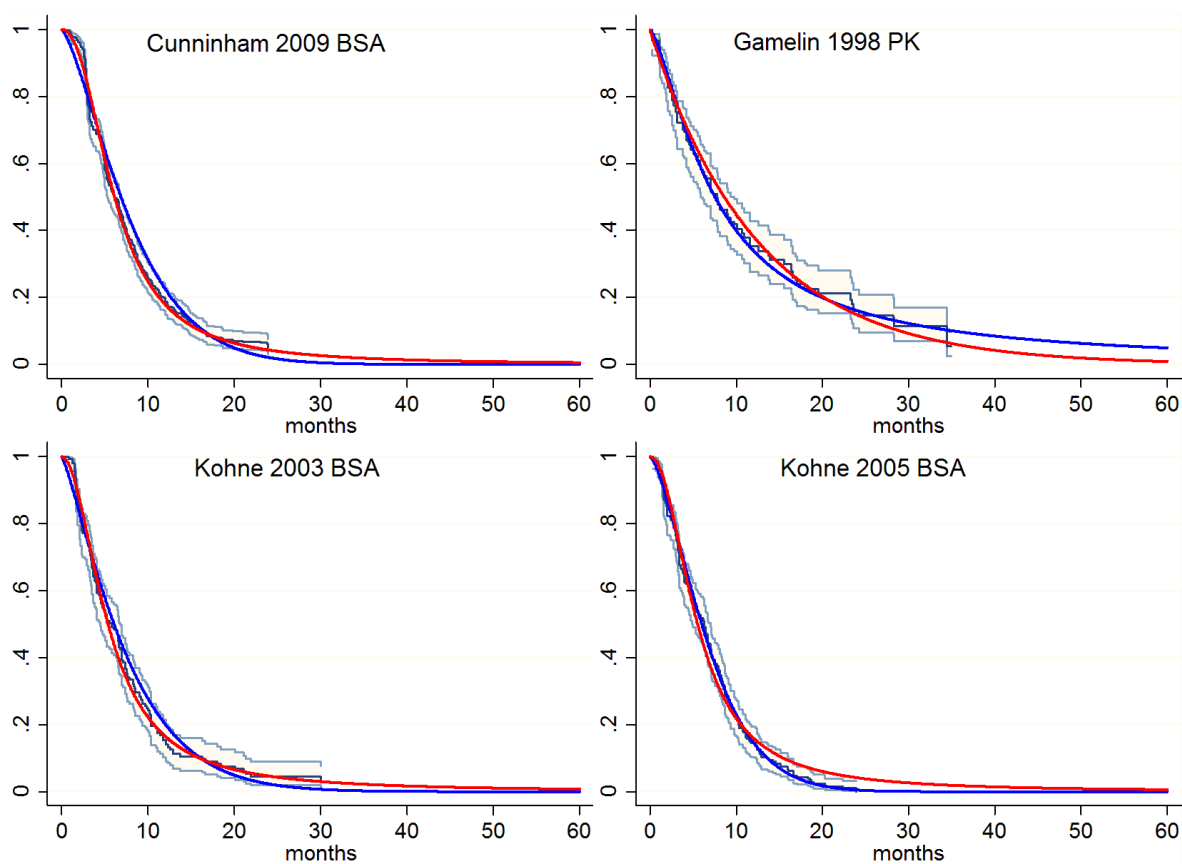

Supplement: MOESM8 [file 10520988]
