# Supplementary material for: Is monitoring of plasma 5-fluorouracil levels in metastatic / advanced colorectal cancer clinically effective? A systematic review
Source: Springer Nature journal article supplement (doi:10.1186/s12885-016-2581-x), 2016-07-25

**ADDITIONAL FILE 9.**

**Relative risk of adverse events in the RCT of Gamelin (PK versus BSA dose adjustment strategies)**

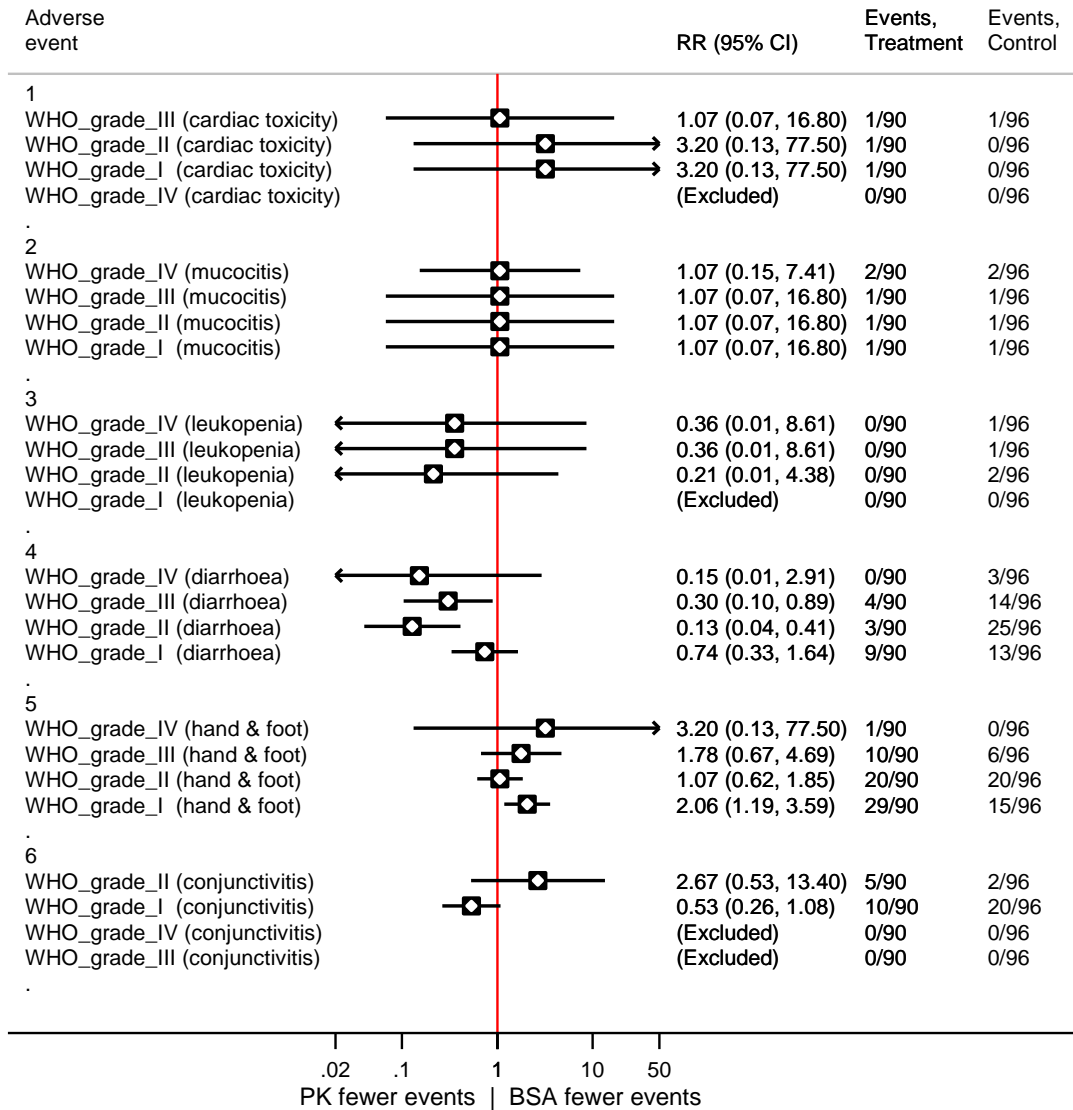

Supplement: MOESM9 [file 10520988]
